# Supplementary material for: Shedding a Light on Dark Genes: A Comparative Expression Study of PRR12 Orthologues during Zebrafish Development
Source: MDPI journal article supplement (doi:10.3390/genes15040492), 2024-04-15
Supplement: s1 [file s1]

**Supplementary Figure S1 Structure comparison of human *PRR12* and zebrafish *prr12* genes.** Exon-intron distribution of human *PRR12* and zebrafish *prr12a* and *prr12b* isoforms. The black dashed box outlines transcript alignment of the high conserved initial part of exon 4 of the *PRR12*, *prr12a* and *prr12b* main isoforms. Asterisks (\*) indicate identical nucleotides. Identity percentage for exon 4 transcripts among human and zebrafish 201 isoforms are the following: 59.55% *PRR12* vs. *prr12a*; 60,14% *PRR12* vs. *prr12b*. Abbreviations: **Hsa**: *Homo sapiens*; **Danre**: *Danio rerio*

**Supplementary Figure S2 Evaluation of *PRR12* protein domains. A-E** Multiple Clustal alignment of *PRR12*-201, *Prr12a*-201, *Prr12b*-201 Glycine-rich 335-685aa (A), Proline-rich 764-1545aa (B), Proline-rich 1666-1737 (C) domains. Tables in A-C represent percentage identity matrices for each set of sequence alignment. Red ovals in D and E highlight the presence/absence of specific lysine (D) and serine (E) aminoacidic residues among human and zebrafish proteins. Abbreviations: **Hsa**: *Homo sapiens*; **Danre**: *Danio rerio*

**Supplementary Figure S3 *PRR12* and *prr12* are associated to the same paralog gene.** Modified version of Ensembl phylogenetic tree showing zebrafish evolutionary maintenance among mammals (green background) and bony fishes (pink background) of *qser1* (in red), ortholog of the human *QSER1* (in red in the Primates node, highlighted by the purple background), as paralog of *prr12* genes (in blue). All the reported genes derive from a common ancestor in Jawed vertebrates.

**Supplementary Figure S4 RNA-Seq profile of *prr12* isoforms.** Publicly available *prr12a*-201 (A) and *prr12b*-201 (B) expression data at increasing developmental stages. Abbreviations: **TPM**: transcripts per million; **hpf**: hours post fertilization; **dpf**: days post fertilization

**Supplementary Figure S5 Expression pattern of *prr12a*-202 A-B** Relative expression analysis of *prr12a*-202 assessed by real time-PCR in embryos (A) and adult specimens (B). Ct values for each timepoint are normalized to *rps11* gene. In (A), asterisks (\*) indicate statistical comparisons between each stage and dome stage; hash marks (#) indicate statistical comparisons between each stage and 50% epiboly stage; degree symbol (°) indicate statistical comparison between each stage and bud stage. Data are expressed as mean ± SD. ANOVA followed by Tukey post-hoc test: \*p<0.05, \*\*p<0.01; #p<0.05; °p<0.05, °°p<0.01. N=3 independent experiments. In (B), Unpaired t test with Welch's correction: \*p<0.05. N=3 independent experiments

**Supplementary Figure S6 Evaluation of *prr12* sense control probes.** Whole-mount in situ hybridization using *prr12a*-201 (A) and *prr12b*-201 sense control probes to assess anti-sense signal specificity in the several developmental stages analysed. Scale bars: 250 µm
