# Supplementary material for: Shedding a Light on Dark Genes: A Comparative Expression Study of PRR12 Orthologues during Zebrafish Development
Source: Genes (Basel). 2024 Apr 15;15(4):492. doi: 10.3390/genes15040492 (PMC11050278; doi:10.3390/genes15040492)
Supplement: Supplementary file 1 [file genes-15-00492-s001.zip]

Archive with 7 entries (7 files):
- Supplementary Figure S1.tif
- Supplementary Figure S2.tif
- Supplementary Figure S3.tif
- Supplementary Figure S4.tif
- Supplementary Figure S5.tif
- Supplementary Figure S6.tif
- Supplementary Figures Legends.pdf
